# Supplementary material for: Design and synthesis of an efficient nanoporous adsorbent for Hg2+ and Pb2+ ions in water
Source: Royal Society of Chemistry journal article supplement (doi:10.1039/c6ta00987e), 2016-01-01
Supplement: c6ta00987e1.pdf [file c6ta00987e1.pdf]

## Supplementary Information

Design and synthesis of an efficient nanoporous absorbent for Hg<sup>2+</sup>  
and Pb<sup>2+</sup> ions in water

Xiaopan Li, Chaoqun Bian, Xiangju Meng\* and Feng-Shou Xiao\*

*Key Laboratory of Applied Chemistry of Zhejiang Province, Zhejiang University,  
Hangzhou 310028, China,*

*\*E-mail: 21337024@zju.edu.cn; 11338060@zju.edu.cn;  
mengxj@zju.edu.cn; fsxiao@zju.edu.cn*

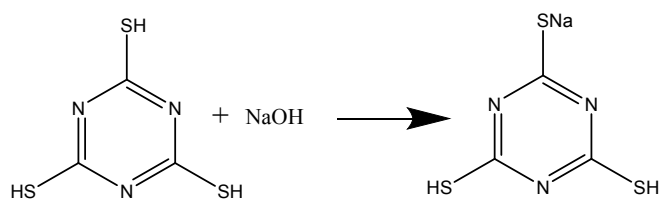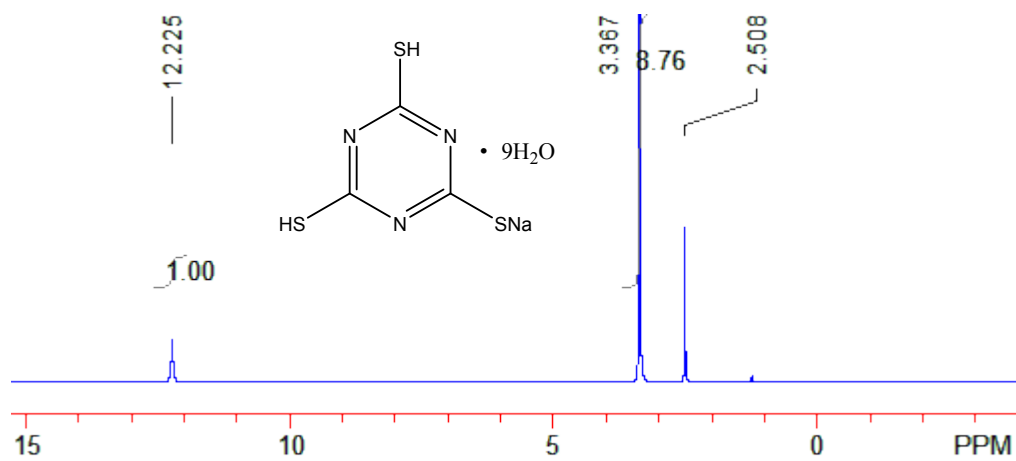

**Fig. S1.** <sup>1</sup>H NMR of trimercaptos-triazine-monosodium salt, (NaH<sub>2</sub>C<sub>3</sub>N<sub>3</sub>S<sub>3</sub>)·9H<sub>2</sub>O  
(-SH: 12.225 ppm; H<sub>2</sub>O: 3.367 ppm; DMSO: 2.508 ppm)

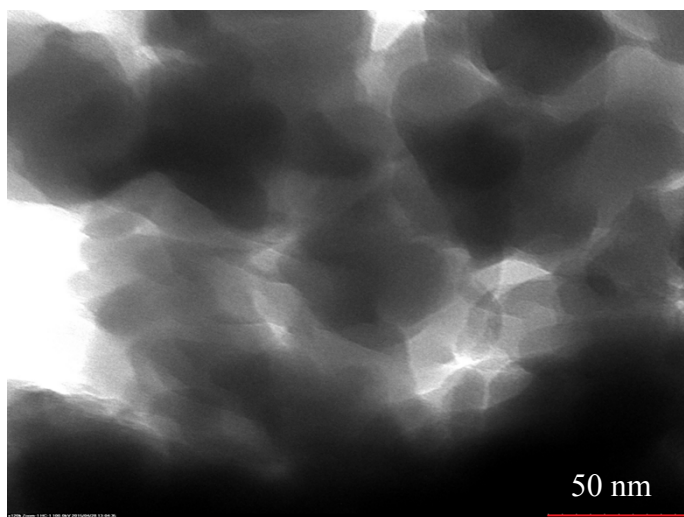

**Fig. S2.** TEM image of PTMT polymer.

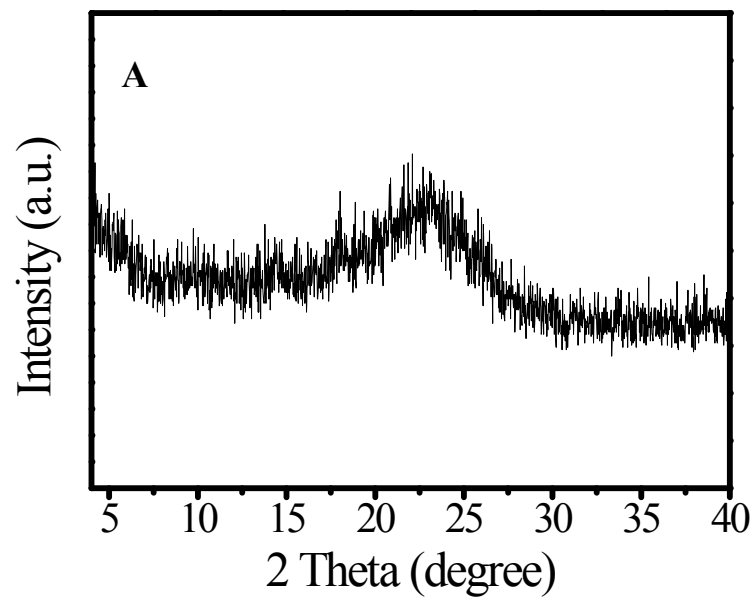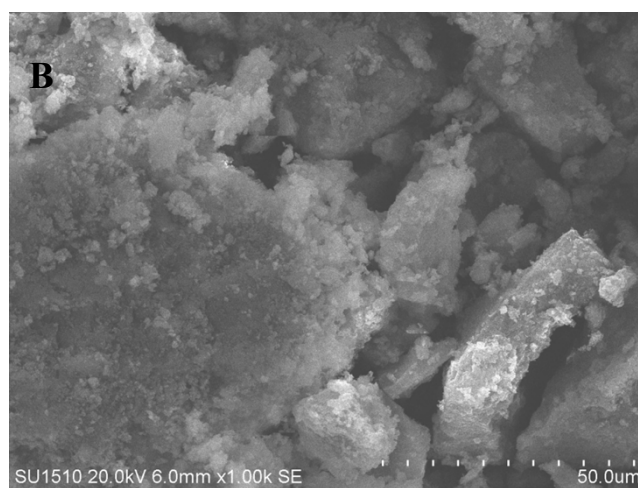

**Fig. S3.** (A) XRD pattern and (B) SEM image of PTMT.

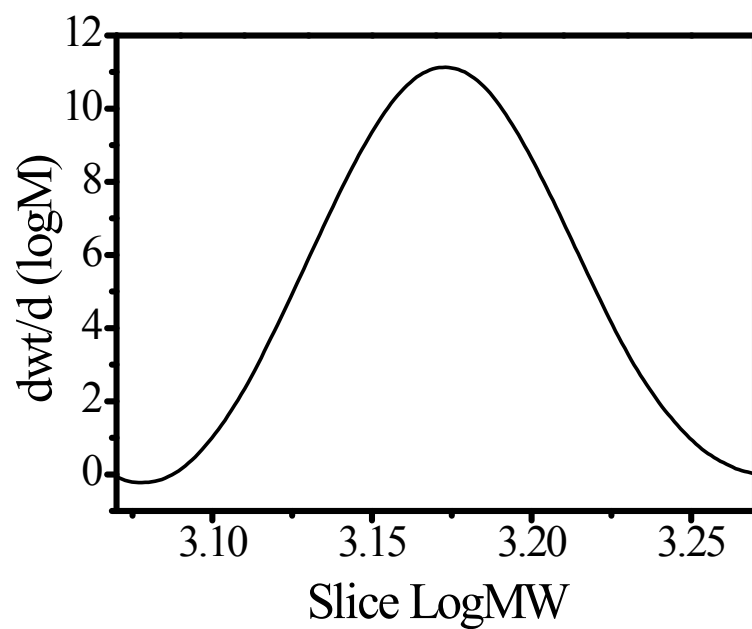

**Fig. S4.** Gel permeation chromatography of PTMT.

**Table S1.** The element analysis data of PTMT

| Element        | C    | N    | S    |
|----------------|------|------|------|
| Mass weight, % | 20.6 | 23.2 | 52.7 |
